# Supplementary material for: Monitoring patients with juvenile idiopathic arthritis using health-related quality of life
Source: Springer Nature journal article supplement (doi:10.1186/s12969-021-00527-z), 2021-03-22
Supplement: MOESM1 [file 18991092]

## **Additional File 1**

### ***Reuma2Go***

‘Reuma2Go’ is a mobile E-health application for the clinical care of children and adolescents with juvenile idiopathic arthritis (JIA) developed in collaboration with patients, parents and caregivers.

The mobile application provides patients with a mobile interface for the self-assessment of joint pain, morning stiffness, usual activities and fatigue, and operates as a communication platform between patients and health care professionals.

In addition, the EQ-5D-Y-5L is included as measurement of health-related quality of life (see screenshots below). Data from the Reuma2Go application are collected in real-time and digitally monitored by our medical staff using a web-based portal.

### Supplementary Figure S1.

EQ-5D-Y-5L Questionnaire as displayed in the Reuma2go application (Step 1 of 7).

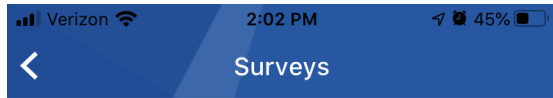

EQ-5D-5L

Your are 0% complete

**Describe your health TODAY! Under each question, please select the answer that best describes your health TODAY.**

Next

### Supplementary Figure S2.

EQ-5D-Y-5L Questionnaire as displayed in the Reuma2go application (Step 2 of 7).

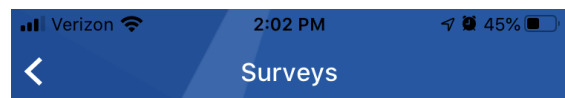

EQ-5D-5L

Your are 17% complete

#### Mobility

I have no problems walking

I have slight problems walking

I have moderate problems walking

I have severe problems walking

I am unable to walk

Prev

Next

### Supplementary Figure S3.

EQ-5D-Y-5L Questionnaire as displayed in the Reuma2go application (Step 3 of 7).

Verizon 2:02 PM 45%

Surveys

EQ-5D-5L

Your are 33% complete

**Take care of myself (e.g. washing or dressing myself)**

I have no problems washing or dressing myself

I have slight problems washing or dressing myself

I have moderate problems washing or dressing myself

I have severe problems washing or dressing myself

I am unable to wash or dress myself

Prev Next

### Supplementary Figure S4.

EQ-5D-Y-5L Questionnaire as displayed in the Reuma2go application (Step 4 of 7).

Verizon 2:02 PM 45%

Surveys

EQ-5D-5L

Your are 50% complete

**Doing daily activities (for example: going to school, hobbies, sports, playing, visiting friends)**

I have no problems doing my daily activities

I have slight problems doing my daily activities

I have moderate problems doing my daily activities

I have severe problems doing my daily activities

I am unable to do my daily activities

Prev Next

**Supplementary Figure S5.**

EQ-5D-Y-5L Questionnaire as displayed in the Reuma2go application (Step 5 of 7).

Verizon 2:02 PM 45%

Surveys

EQ-5D-5L

Your are 67% complete

**Pain or other complaints**

I have no pain or other complaints

I have slight pain or other complaints

I have moderate pain or other complaints

I have severe pain or other complaints

I have extreme pain or other complaints

Prev Next

**Supplementary Figure S6.**

EQ-5D-Y-5L Questionnaire as displayed in the Reuma2go application (Step 6 of 7).

Verizon 2:03 PM 45%

Surveys

EQ-5D-5L

Your are 83% complete

**Being worried, sad or unhappy**

I am not worried, sad, or unhappy

I am slightly worried, sad, or unhappy

I am moderately worried, sad, or unhappy

I am severely worried, sad, or unhappy

I am extremely worried, sad, or unhappy

Prev Next

**Supplementary Figure S7.**

EQ-5D-Y-5L Questionnaire as displayed in the Reuma2go application (Step 7 of 7).

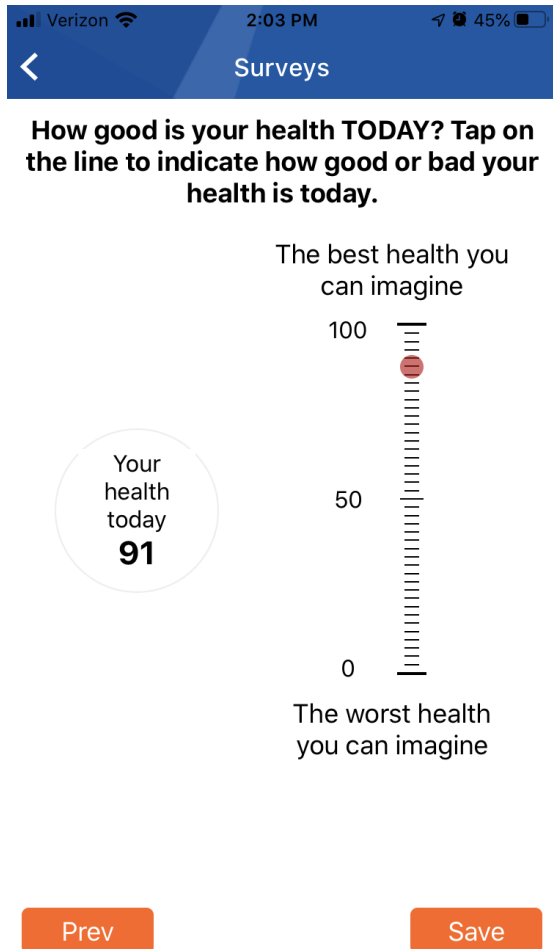

**Supplementary Figure S8A-F.** ROC curves of individual EQ-5D-Y-5L domains and EQ-VAS to identify JIA patients with moderate to high disease activity.

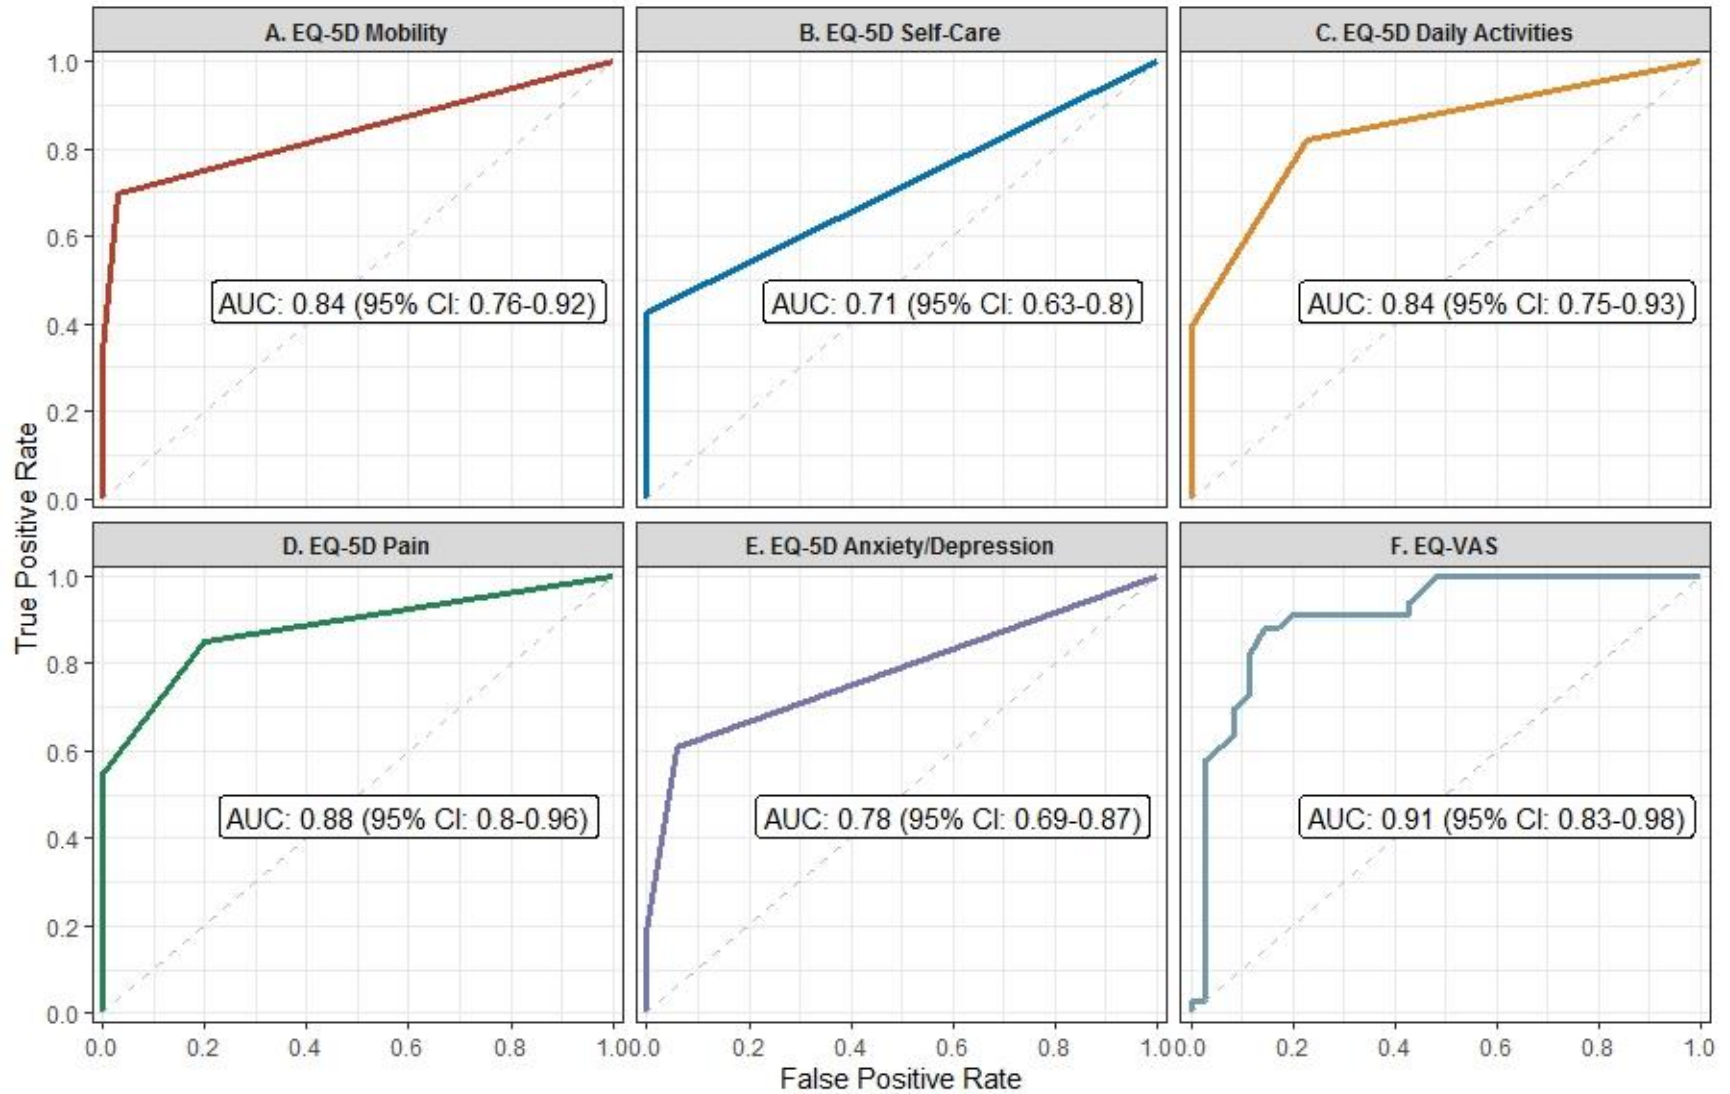

**Acknowledgements:** The EQ-5D-Y-5L is a copyrighted instrument, which can be obtained from the EuroQol Research Foundation by registering at their website [www.euroqol.org](http://www.euroqol.org). No license fee will be charged for non-commercial use.

Reuma2Go is a copyrighted mobile application and accompanying web-based portal was built on the MyOwnMed, Inc., platform (Bethesda, USA) MyOwnMed, Inc.
